# Supplementary material for: New copper aryl phosphonates with auxiliary nitrogen ligands
Source: Royal Society of Chemistry journal article supplement (doi:10.1039/c2ce06675k), 2012-01-01
Supplement: c2ce06675k.pdf [file c2ce06675k.pdf]

## Supporting Information

### New copper aryl phosphonates with auxiliary nitrogen ligands

Vítězslav Zima<sup>1</sup>, Jan Svoboda<sup>1</sup>, Ya-Ching Yang<sup>2</sup>, Sue-Lein Wang<sup>2</sup>

<sup>1</sup> Institute of Macromolecular Chemistry AS CR, v.v.i., Heyrovský Sq. 2, 16206, Prague 6, Czech Republic; present address: Joint Laboratory of Solid State Chemistry of Institute of Macromolecular Chemistry AS CR, v.v.i. and the University of Pardubice, 532 10 Pardubice, Czech Republic

<sup>2</sup>National Tsing Hua University, Department of Chemistry, 101 Kuang Fu Rd., Hsinchu, Taiwan

#### TABLE AND FIGURE CAPTIONS

Table S1. Selected bond distances (Å) and angles (°) for **1** - **5**.

Table S2. Distances (Å) and angles (°) of hydrogen bonds.

Figure S1. ORTEP of compound **1**.

Figure S2. ORTEP of compound **2**.

Figure S3. ORTEP of compound **3**.

Figure S4. ORTEP of compound **4**.

Figure S5. ORTEP of compound **5**.

Figure S6 Fragment of the layer of **1** viewed along the *ac* diagonal. The hydrogen bonds are indicated by dashed lines.

Figure S7 Stacking of the layers in **1**.

Figure S8 Thermogravimetric curves of compounds **1-5**.

Figure S9 Formation of the helical chain in compound **2**. The phen molecules are omitted for clarity.

Figure S10 System of hydrogen bonds in the fragment of **3**.

Figure S11 Chain stacking in the structure of **3**.

Figure S12 Stacking of the layers in **4** viewed along the *ab* diagonal.

Figure S13 Hydrogen bonds in the ring fragment of **4**.

Figure S14 System of hydrogen bonds in the layer of phosphonate/phosphonic acid molecules of **5**.

Figure S15 Powder X-ray pattern of **3**.

Figure S16 Powder X-ray pattern of **5**.

**Table S1.** Selected bond distances (Å) and angles (°) for **1** - **5**.

**1**

|            |            |            |            |            |            |
|------------|------------|------------|------------|------------|------------|
| Cu(1)-O(4) | 1.9053(15) | Cu(1)-O(1) | 2.3596(15) | S(1)-C(13) | 1.7750(19) |
| Cu(1)-O(6) | 1.9136(14) | S(1)-O(3)  | 1.4356(17) | P(1)-O(4)  | 1.4867(15) |
| Cu(1)-N(1) | 2.0113(16) | S(1)-O(2)  | 1.4491(17) | P(1)-O(6)  | 1.4939(14) |
| Cu(1)-N(2) | 2.0146(16) | S(1)-O(1)  | 1.4653(15) | P(1)-O(5)  | 1.5510(18) |

|                 |           |                 |            |                 |            |
|-----------------|-----------|-----------------|------------|-----------------|------------|
| O(4)-Cu(1)-O(6) | 94.41(6)  | N(1)-Cu(1)-O(1) | 88.93(6)   | O(4)-P(1)-O(6)  | 116.27(10) |
| O(4)-Cu(1)-N(1) | 91.69(7)  | N(2)-Cu(1)-O(1) | 90.41(6)   | O(4)-P(1)-O(5)  | 110.94(12) |
| O(6)-Cu(1)-N(1) | 161.49(7) | O(3)-S(1)-O(2)  | 114.80(11) | O(6)-P(1)-O(5)  | 111.49(11) |
| O(4)-Cu(1)-N(2) | 173.31(7) | O(3)-S(1)-O(1)  | 113.21(10) | O(4)-P(1)-C(16) | 105.88(9)  |
| O(6)-Cu(1)-N(2) | 92.07(7)  | O(2)-S(1)-O(1)  | 109.83(10) | O(6)-P(1)-C(16) | 107.65(9)  |
| N(1)-Cu(1)-N(2) | 81.63(7)  | O(3)-S(1)-C(13) | 107.36(10) | O(5)-P(1)-C(16) | 103.62(9)  |
| O(4)-Cu(1)-O(1) | 89.10(7)  | O(2)-S(1)-C(13) | 105.31(9)  |                 |            |
| O(6)-Cu(1)-O(1) | 108.61(7) | O(1)-S(1)-C(13) | 105.56(9)  |                 |            |

**2**

|            |            |            |            |            |            |
|------------|------------|------------|------------|------------|------------|
| Cu(1)-O(2) | 1.9107(19) | Cu(1)-O(4) | 2.215(2)   | O(5)-C(18) | 1.271(3)   |
| Cu(1)-O(5) | 1.9616(18) | P(1)-O(2)  | 1.5043(19) | O(5)-Cu(1) | 1.9616(18) |
| Cu(1)-N(2) | 2.031(2)   | P(1)-O(3)  | 1.508(2)   | O(6)-C(18) | 1.244(3)   |
| Cu(1)-N(1) | 2.045(2)   | P(1)-O(1)  | 1.5653(18) |            |            |

|                 |           |                 |            |                  |            |
|-----------------|-----------|-----------------|------------|------------------|------------|
| O(2)-Cu(1)-O(5) | 96.02(8)  | O(2)-Cu(1)-O(4) | 90.56(9)   | O(3)-P(1)-O(1)   | 111.93(11) |
| O(2)-Cu(1)-N(2) | 167.50(9) | O(5)-Cu(1)-O(4) | 102.93(8)  | O(2)-P(1)-C(12)  | 110.72(12) |
| O(5)-Cu(1)-N(2) | 93.59(9)  | N(2)-Cu(1)-O(4) | 95.06(9)   | O(3)-P(1)-C(12)  | 108.46(12) |
| O(2)-Cu(1)-N(1) | 88.30(9)  | N(1)-Cu(1)-O(4) | 89.26(8)   | O(1)-P(1)-C(12)  | 102.62(11) |
| O(5)-Cu(1)-N(1) | 166.98(9) | O(2)-P(1)-O(3)  | 111.29(11) | P(1)-O(2)-Cu(1)  | 144.48(13) |
| N(2)-Cu(1)-N(1) | 80.64(9)  | O(2)-P(1)-O(1)  | 111.45(12) | C(18)-O(5)-Cu(1) | 110.47(17) |

O(6)-C(18)-O(5) 123.0(2)

O(6)-C(18)-C(19) 119.7(2)

**3**

Cu(1)- O(4) 1.9367(13)

P(1)- O(3) 1.5042(15)

P(2)- O(6) 1.5782(16)

Cu(1)- O(1) 1.9799(13)

P(1)- O(1) 1.5290(14)

P(3)- O(7) 1.5060(18)

Cu(1)- N(1) 1.9985(17)

P(1)- O(2) 1.5526(15)

P(3)- O(8) 1.5217(17)

Cu(1)- N2 2.0241(16)

P(2)- O(5) 1.5009(17)

P(3)- O(9) 1.5675(18)

Cu(1)- O(1) 2.2569(14)

P(2)- O(4) 1.5092(15)

O(4) -Cu(1)- O(1) 91.55(6)

O3 -P(1)- O2 110.16(9)

O(7) -P(3)- O(8) 116.98(10)

O(4) -Cu(1)- N(1) 91.23(7)

O(1) -P(1)- O2 108.87(8)

O(7) -P(3)- O9 109.83(9)

O(1) -Cu(1)- N(1) 176.85(6)

O3 -P(1)- C1 107.10(8)

O(8) -P(3)- O(9) 107.11(11)

O(4) -Cu(1)- N(2) 165.03(7)

O(1) -P(1)- C1 108.93(8)

O(7) -P(3)- C3 109.34(10)

O(1) -Cu(1)- N(2) 95.14(6)

O2 -P(1)- C1 107.61(8)

O(8) -P(3)- C3 106.64(9)

N(1) -Cu(1)- N(2) 81.81(7)

O(5) -P(2)- O(4) 117.04(9)

O(9) -P(3)- C3 106.41(10)

O(4) -Cu(1)- O(1) 97.11(6)

O(5) -P(2)- O(6) 110.81(9)

P(1) -O(1)- Cu(1) 128.44(8)

O(1) -Cu(1)- O(1) 82.09(5)

O(4) -P(2)- O(6) 107.14(9)

P(1) -O(1)- Cu(1) 133.27(8)

N(1) -Cu(1)- O(1) 99.03(6)

O(5) -P(2)- C2 109.69(9)

Cu(1) -O(1)- Cu(1) 97.91(5)

N(2) -Cu(1)- O(1) 97.07(6)

O(4) -P(2)- C2 105.53(9)

O3 -P(1)- O(1) 113.96(8)

O(6) -P(2)- C2 105.96(9)

**4**

|            |            |            |            |           |            |
|------------|------------|------------|------------|-----------|------------|
| Cu(1)-O(3) | 1.9260(12) | Cu(1)-O(5) | 2.2589(13) | P(2)-O(4) | 1.4968(12) |
| Cu(1)-O(1) | 1.9334(12) | P(1)-O(1)  | 1.5039(13) | P(2)-O(5) | 1.5125(12) |
| Cu(1)-N(1) | 1.9939(14) | P(1)-O(2)  | 1.5593(13) | P(2)-O(6) | 1.5694(13) |
| Cu(1)-N(2) | 2.0216(15) | P(1)-C(1)  | 1.7987(15) | P(2)-C(4) | 1.8142(16) |

|                 |           |                 |           |                |           |
|-----------------|-----------|-----------------|-----------|----------------|-----------|
| O(3)-Cu(1)-O(1) | 93.74(5)  | O(3)-Cu(1)-O(5) | 99.05(6)  | O(3)-P(1)-O(2) | 110.50(8) |
| O(3)-Cu(1)-N(1) | 90.85(6)  | O(1)-Cu(1)-O(5) | 93.31(5)  | O(1)-P(1)-C(1) | 106.12(7) |
| O(1)-Cu(1)-N(1) | 171.79(5) | N(1)-Cu(1)-O(5) | 92.69(6)  | O(4)-P(2)-O(5) | 115.60(7) |
| O(3)-Cu(1)-N(2) | 164.22(6) | N(2)-Cu(1)-O(5) | 94.53(5)  | O(4)-P(2)-O(6) | 111.15(7) |
| O(1)-Cu(1)-N(2) | 93.46(5)  | O(1)-P(1)-O(3)  | 116.36(7) | O(5)-P(2)-O(6) | 109.89(7) |
| N(1)-Cu(1)-N(2) | 80.47(6)  | O(1)-P(1)-O(2)  | 111.20(7) |                |           |

**5**

|            |            |            |            |           |            |
|------------|------------|------------|------------|-----------|------------|
| Cu(1)-N(3) | 2.0485(19) | P(1)-O(2)  | 1.4924(17) | P(2)-O(4) | 1.5003(17) |
| Cu(1)-N(2) | 2.054(2)   | P(1)-O(3)  | 1.5244(17) | P(2)-O(6) | 1.5090(17) |
| Cu(1)-N(1) | 2.055(2)   | P(1)-O(1)  | 1.5484(17) | P(2)-O(5) | 1.5622(17) |
| Cu(1)-N(4) | 2.071(2)   | P(1)-C(25) | 1.799(2)   |           |            |

|                 |           |                 |            |                 |            |
|-----------------|-----------|-----------------|------------|-----------------|------------|
| N(3)-Cu(1)-N(2) | 147.36(9) | O(2)-P(1)-O(3)  | 115.54(10) | O(4)-P(2)-O(6)  | 115.61(10) |
| N(3)-Cu(1)-N(1) | 118.01(8) | O(2)-P(1)-O(1)  | 112.64(10) | O(4)-P(2)-O(5)  | 111.78(10) |
| N(2)-Cu(1)-N(1) | 81.18(8)  | O(3)-P(1)-O(1)  | 105.12(10) | O(6)-P(2)-O(5)  | 106.16(10) |
| N(3)-Cu(1)-N(4) | 80.95(8)  | O(2)-P(1)-C(25) | 107.70(10) | O(4)-P(2)-C(28) | 109.02(9)  |
| N(2)-Cu(1)-N(4) | 104.32(8) | O(3)-P(1)-C(25) | 108.33(10) | O(6)-P(2)-C(28) | 109.02(10) |
| N(1)-Cu(1)-N(4) | 135.32(9) | O(1)-P(1)-C(25) | 107.15(10) | O(5)-P(2)-C(28) | 104.63(10) |

**Table S2.** Distances (Å) and angles (°) of hydrogen bonds.

| compound | D-H...A     | D-H       | H...A     | D...A     | D-H...A    |
|----------|-------------|-----------|-----------|-----------|------------|
| <b>1</b> | O7-H14...O1 | 0.899(2)  | 1.919(2)  | 2.786(2)  | 161.5(1)   |
|          | O7-H15...O2 | 0.899(2)  | 1.863(2)  | 2.736(2)  | 163.2(1)   |
|          | O5-H13...O7 | 0.913(2)  | 1.662(2)  | 2.564(2)  | 169.0(1)   |
| <b>2</b> | O1-H1...O3  | 0.820(2)  | 1.760(2)  | 2.571(2)  | 170.3(1)   |
|          | O4-H4... O3 | 0.700(2)  | 2.061(2)  | 2.758(2)  | 179.1(1)   |
|          | O4-H4...O6  | 0.694(2)  | 2.056(2)  | 2.750(2)  | 178.7(1)   |
| <b>3</b> | O2-H17...O5 | 0.9249(1) | 1.5988(1) | 2.5184(2) | 172.358(8) |
|          | O6-H16...O7 | 0.8506(1) | 1.7886(1) | 2.6257(2) | 167.558(8) |
|          | O9-H15...O7 | 0.798(1)  | 1.8064(1) | 2.5931(1) | 168.464(9) |
| <b>4</b> | O2-H02...O5 | 0.907(2)  | 1.620(2)  | 2.526(2)  | 176.2(1)   |
|          | O6-H06...O4 | 0.891(1)  | 1.714(1)  | 2.604(2)  | 176.5(1)   |
| 5        | O1-H22...O4 | 1.005(1)  | 1.527(1)  | 2.527(1)  | 172.5(1)   |
|          | O5-H21...O2 | 0.858(1)  | 1.764(1)  | 2.600(1)  | 164.3(1)   |
|          | O3-H23...O6 | 0.820(1)  | 1.639(1)  | 2.435(1)  | 162.8(2)   |



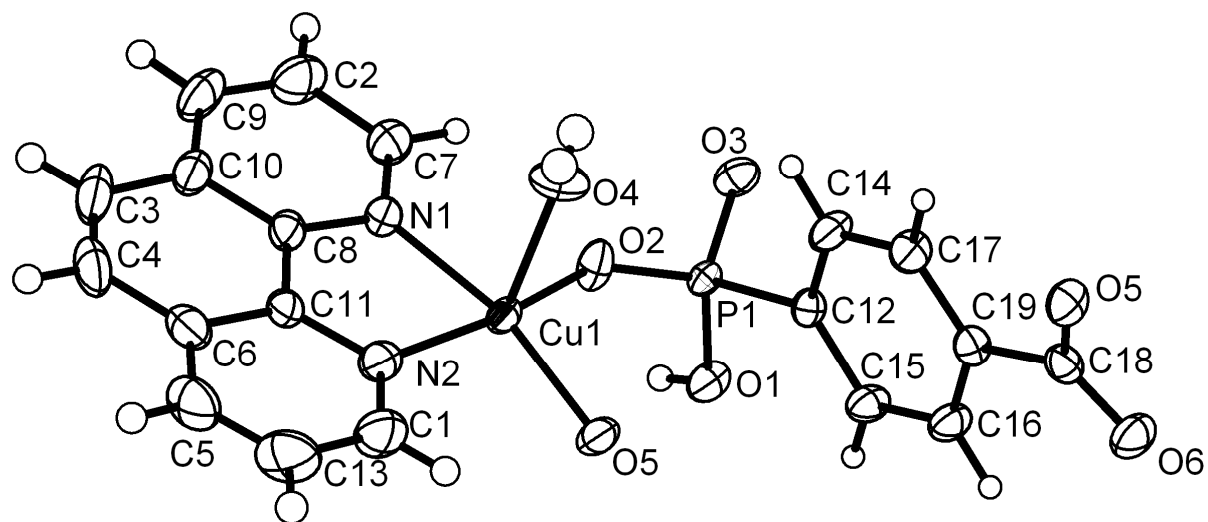

Figure S2 ORTEP drawing of 2.

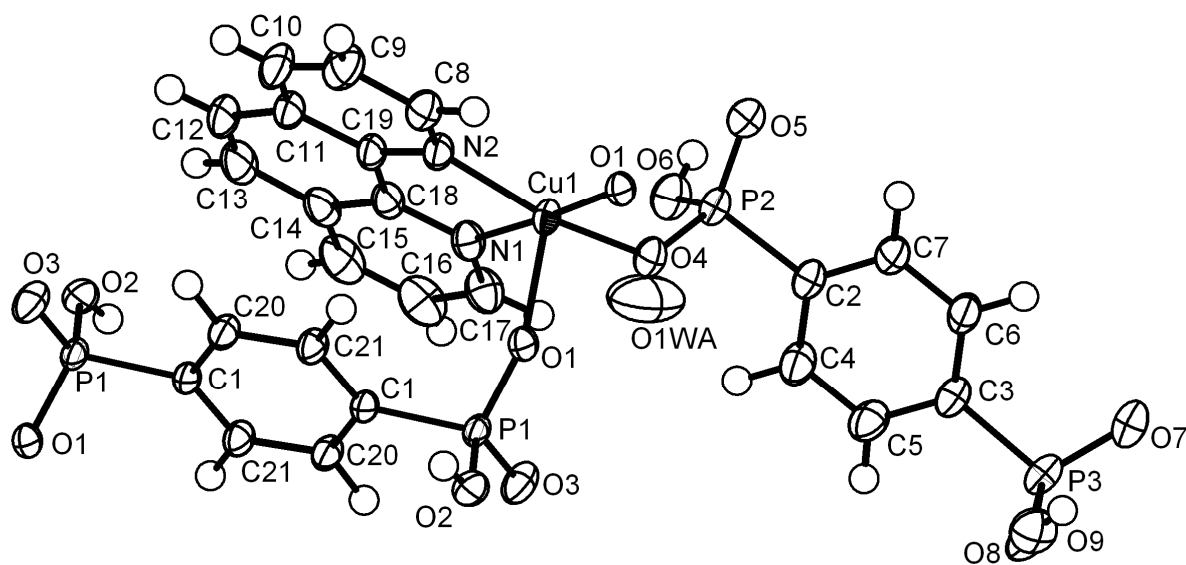

**Figure S3** ORTEP drawing of **3**.



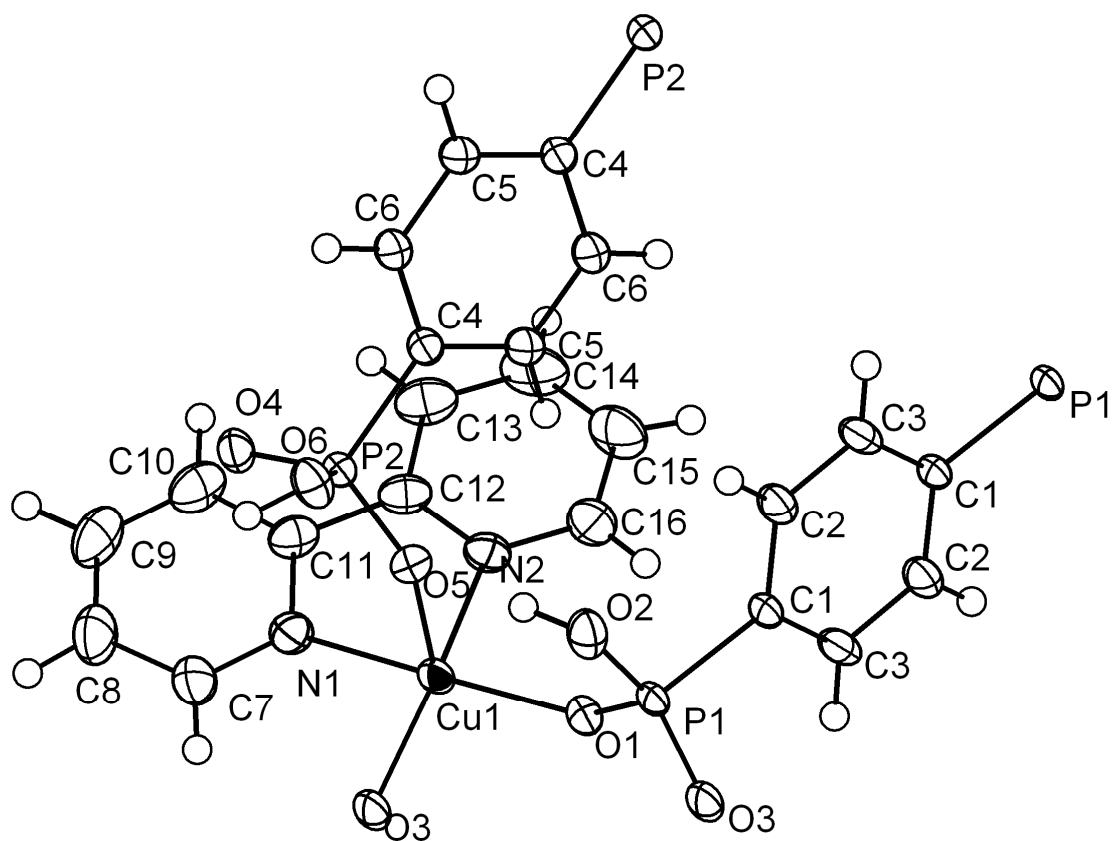

**Figure S4** ORTEP drawing of **4**.

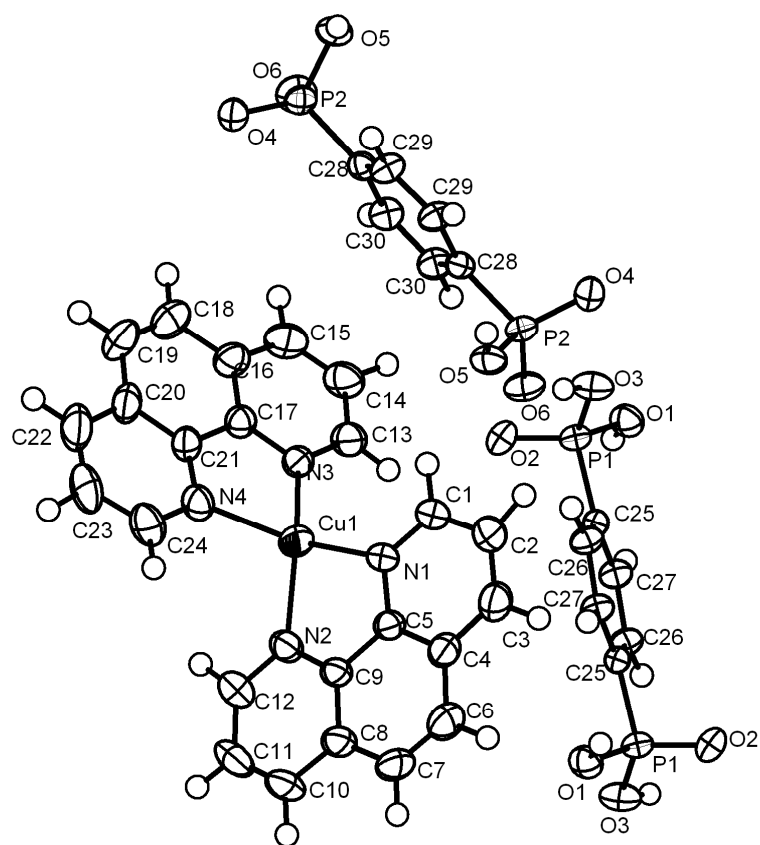

Figure S5 ORTEP drawing of 5.

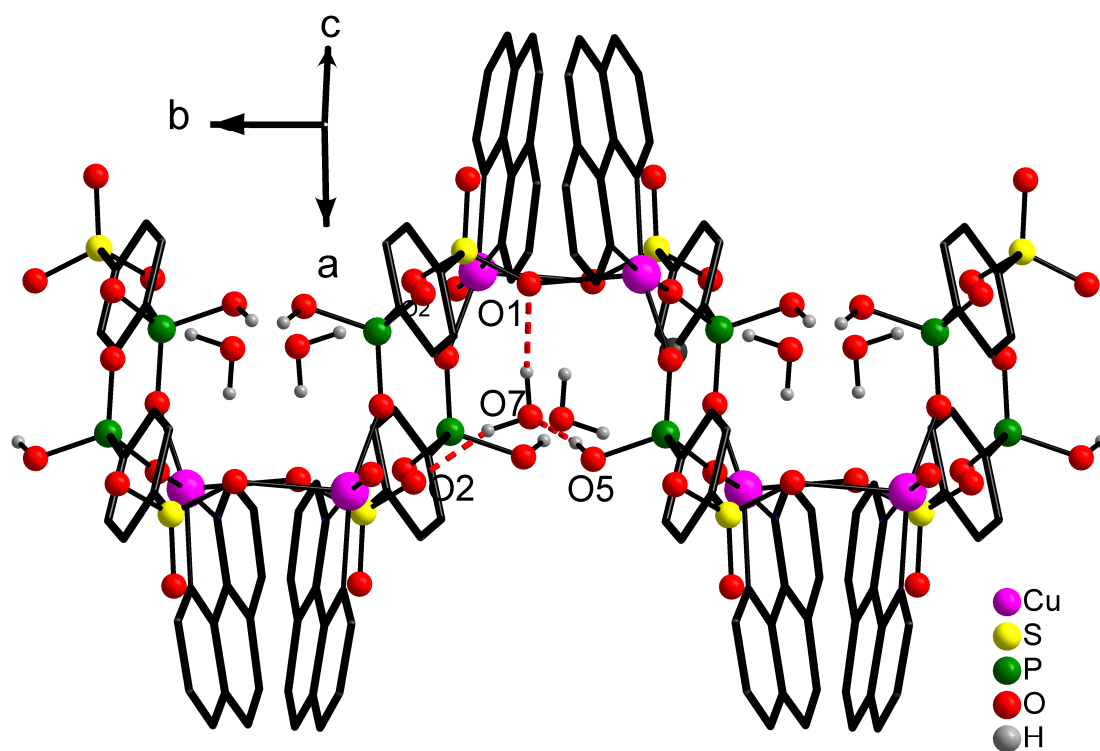

**Figure S6** Fragment of the layer of **1** viewed along the ac diagonal. The hydrogen bonds are indicated by dashed lines.

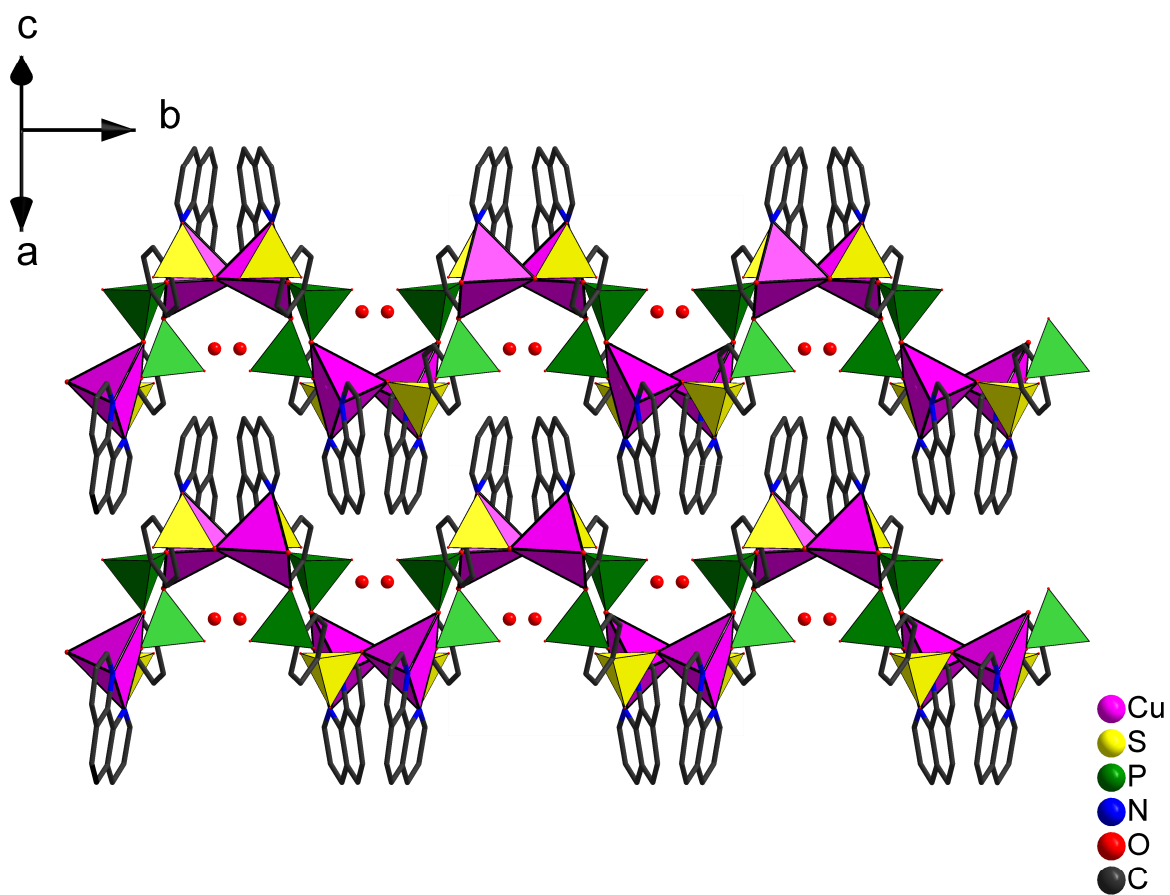

Figure S7 Stacking of the layers in **1**.

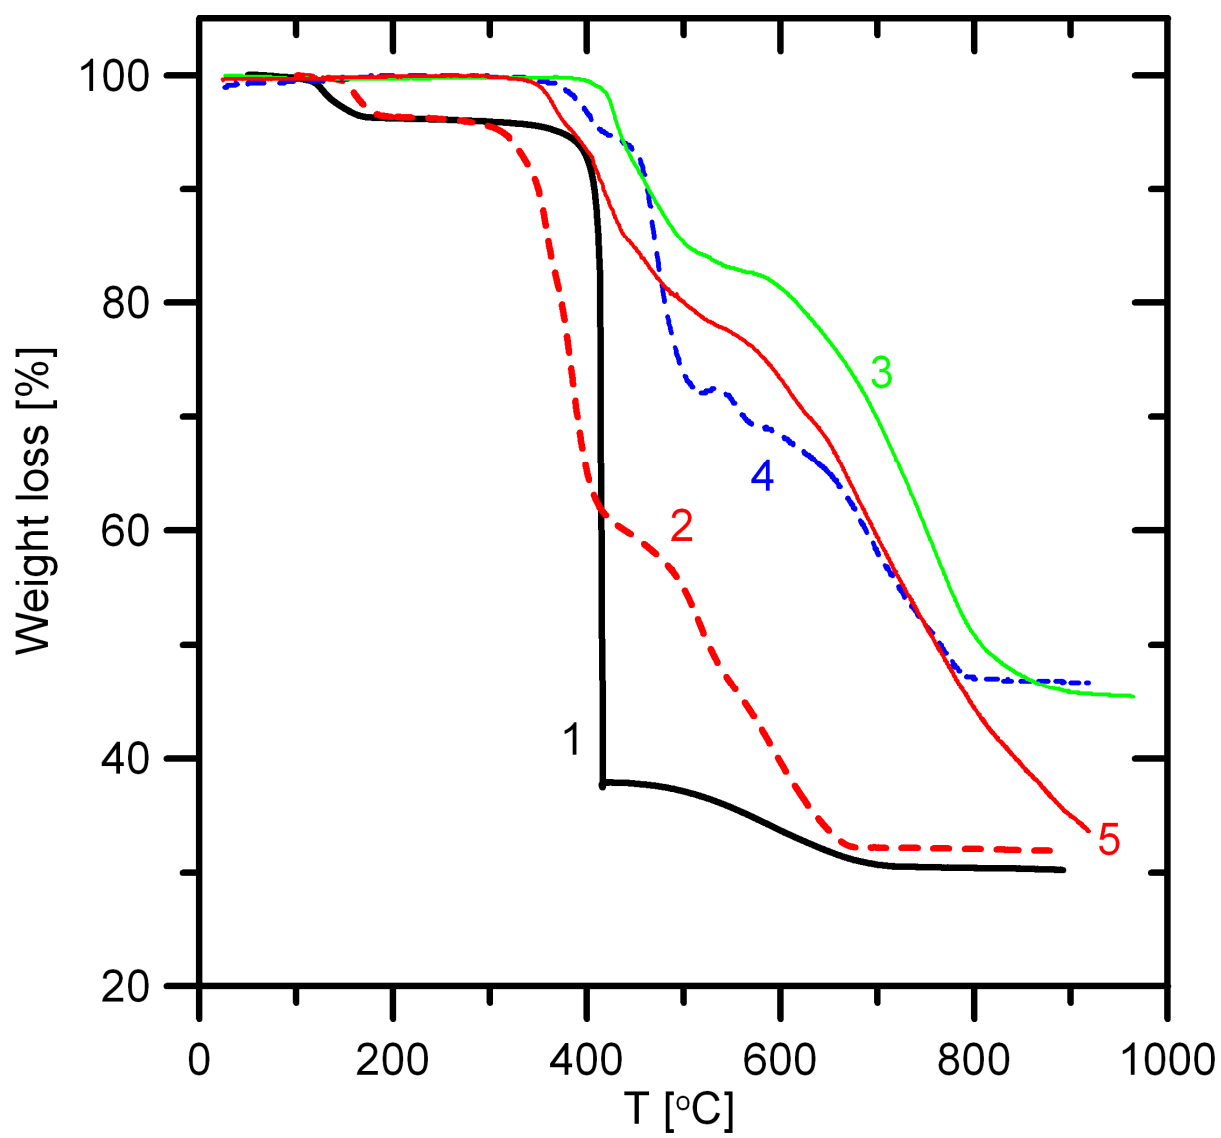

**Figure S8** Thermogravimetric curves of compounds 1-5.

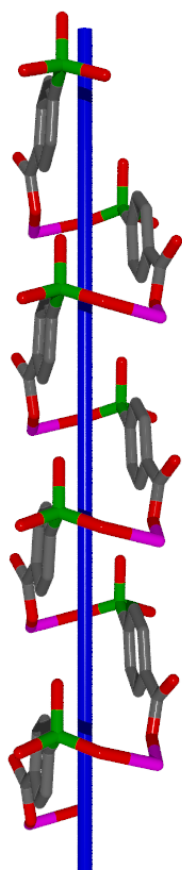

**Figure S9** Formation of the helical chain in compound 2. The phen molecules are omitted for clarity.

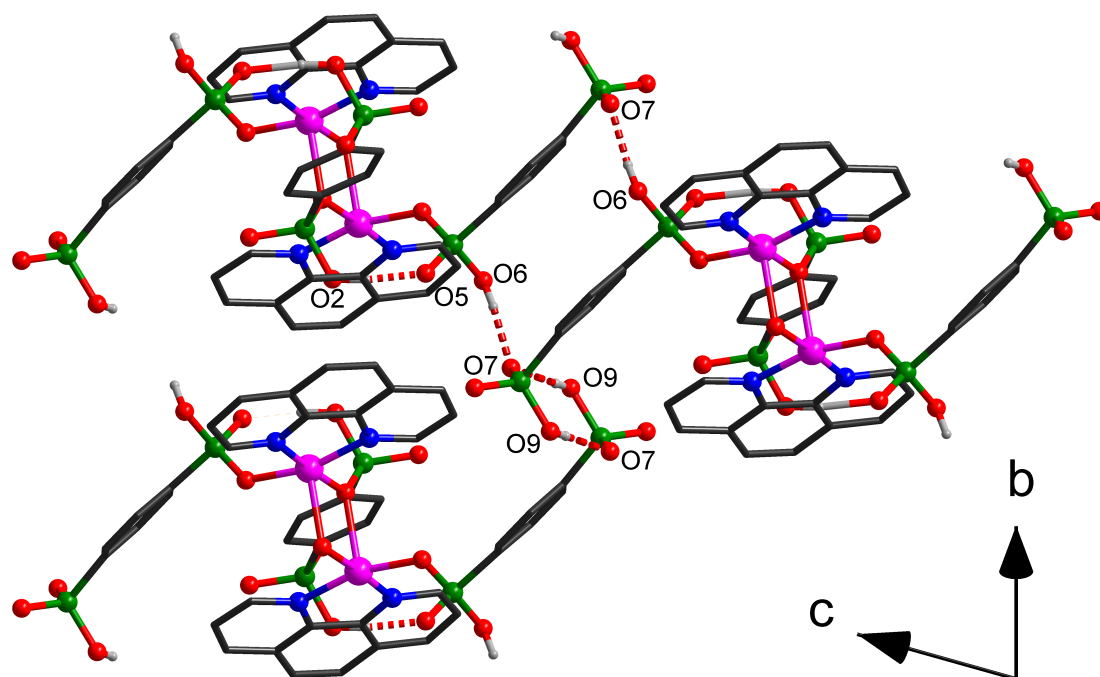

**Figure S10** System of hydrogen bonds in the fragment of **3**.

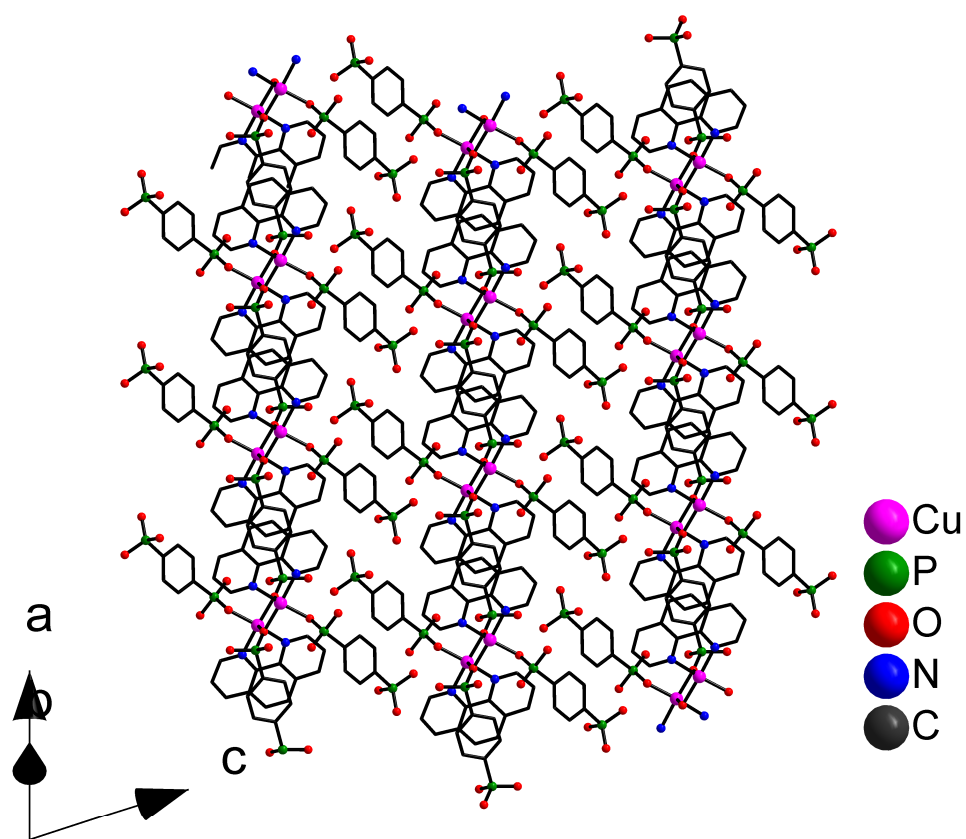

**Figure S11** Chain stacking in the structure of **3**.



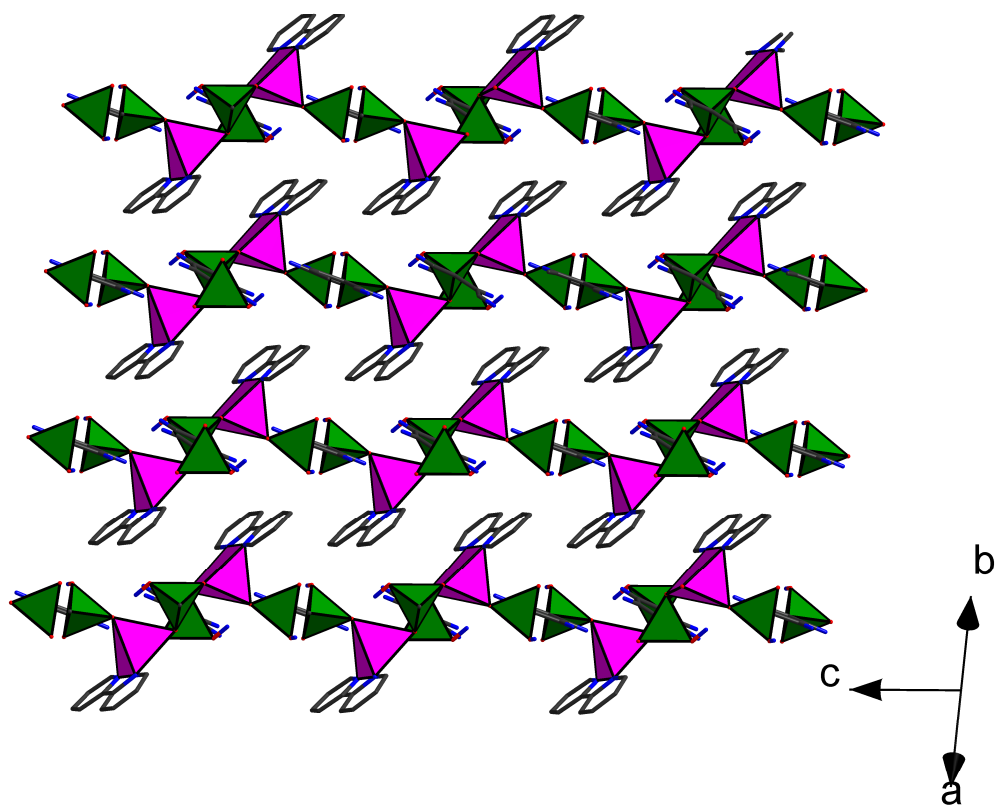

**Figure S12** Stacking of the layers in **4** viewed along the  $ab$  diagonal.

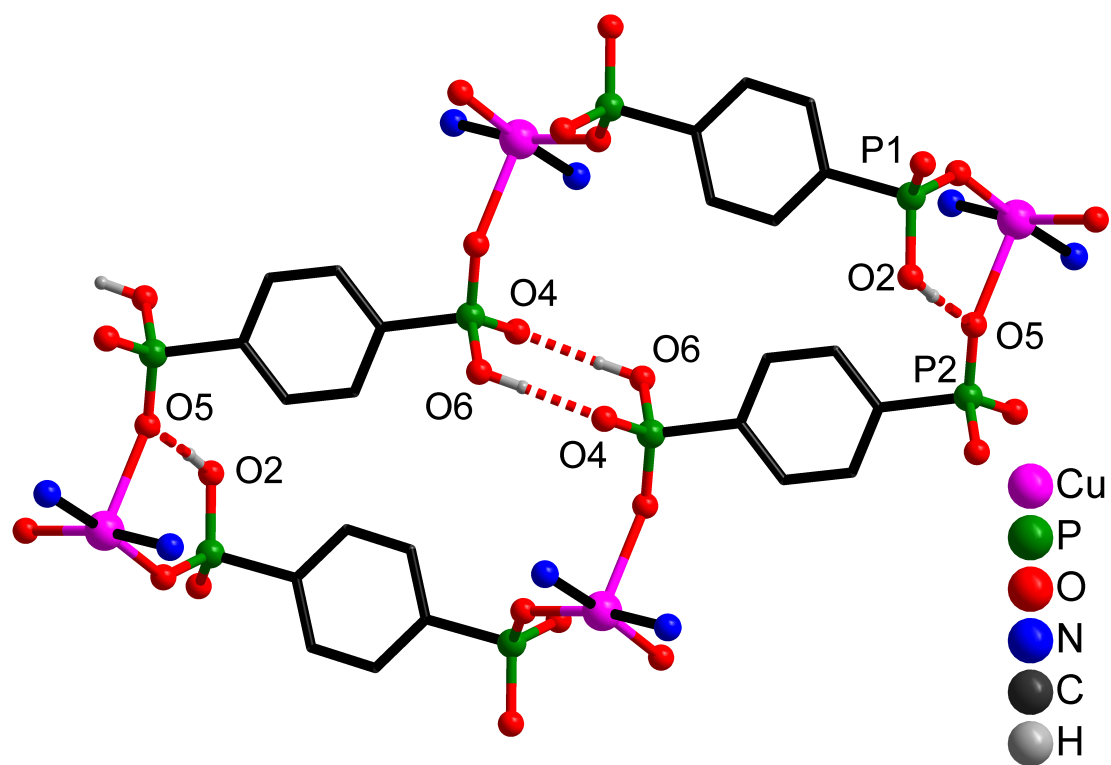

**Figure S13** Hydrogen bonds in the ring fragment of **4**.

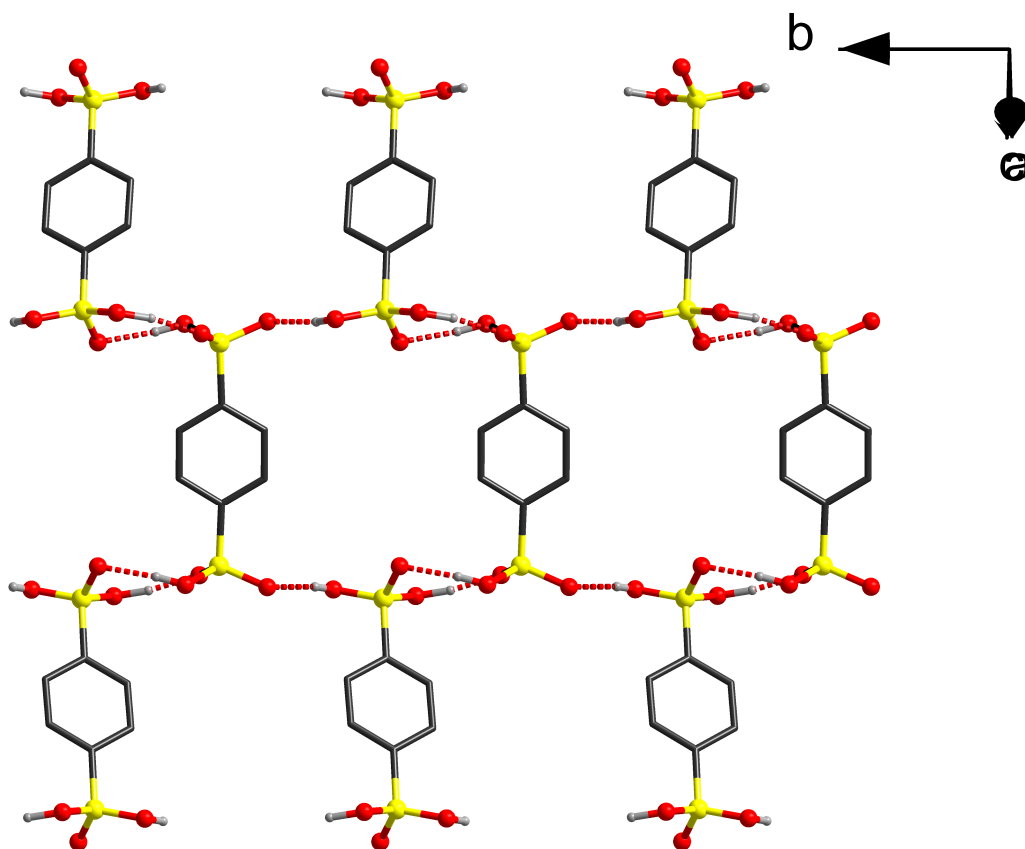

**Figure S14** Hydrogen bonds in the organic fragment of **4**.

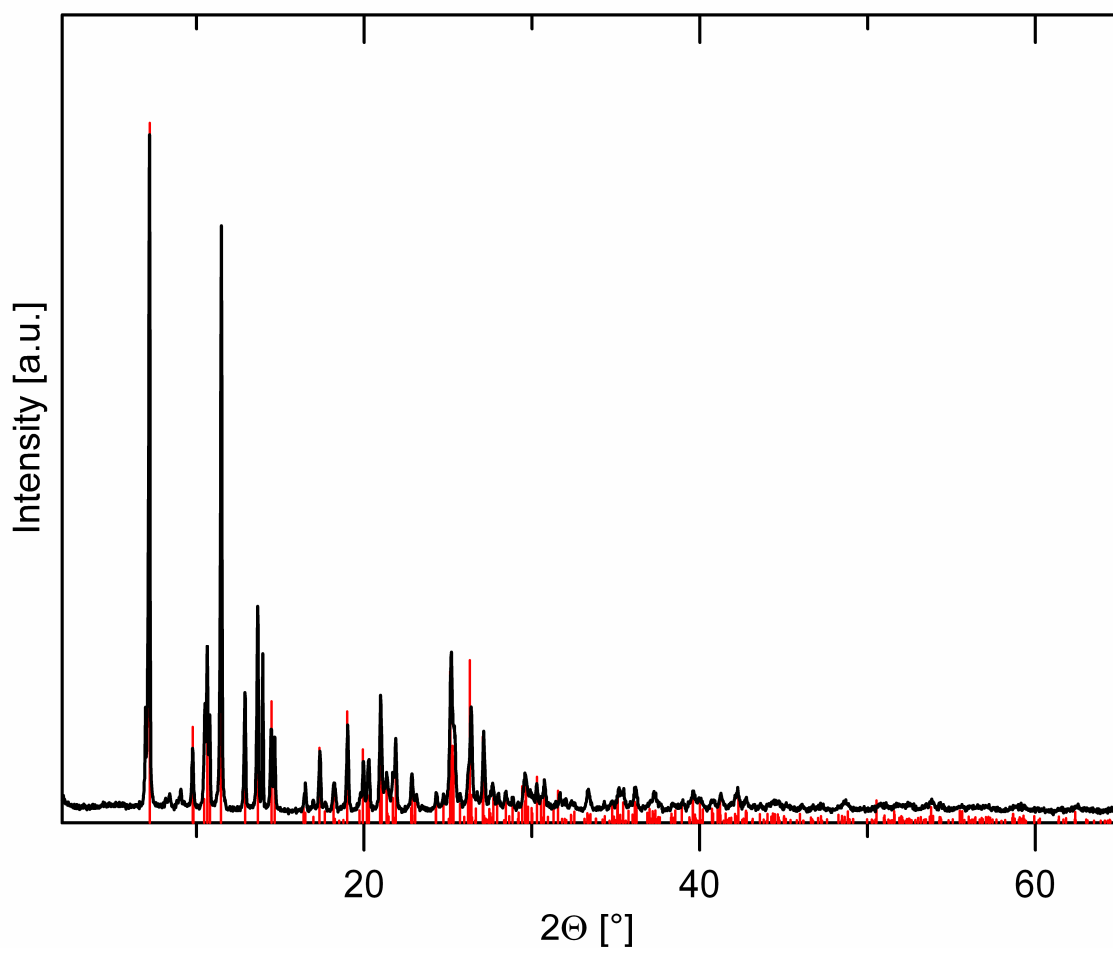

**Figure S15** Powder X-ray pattern of **3**.

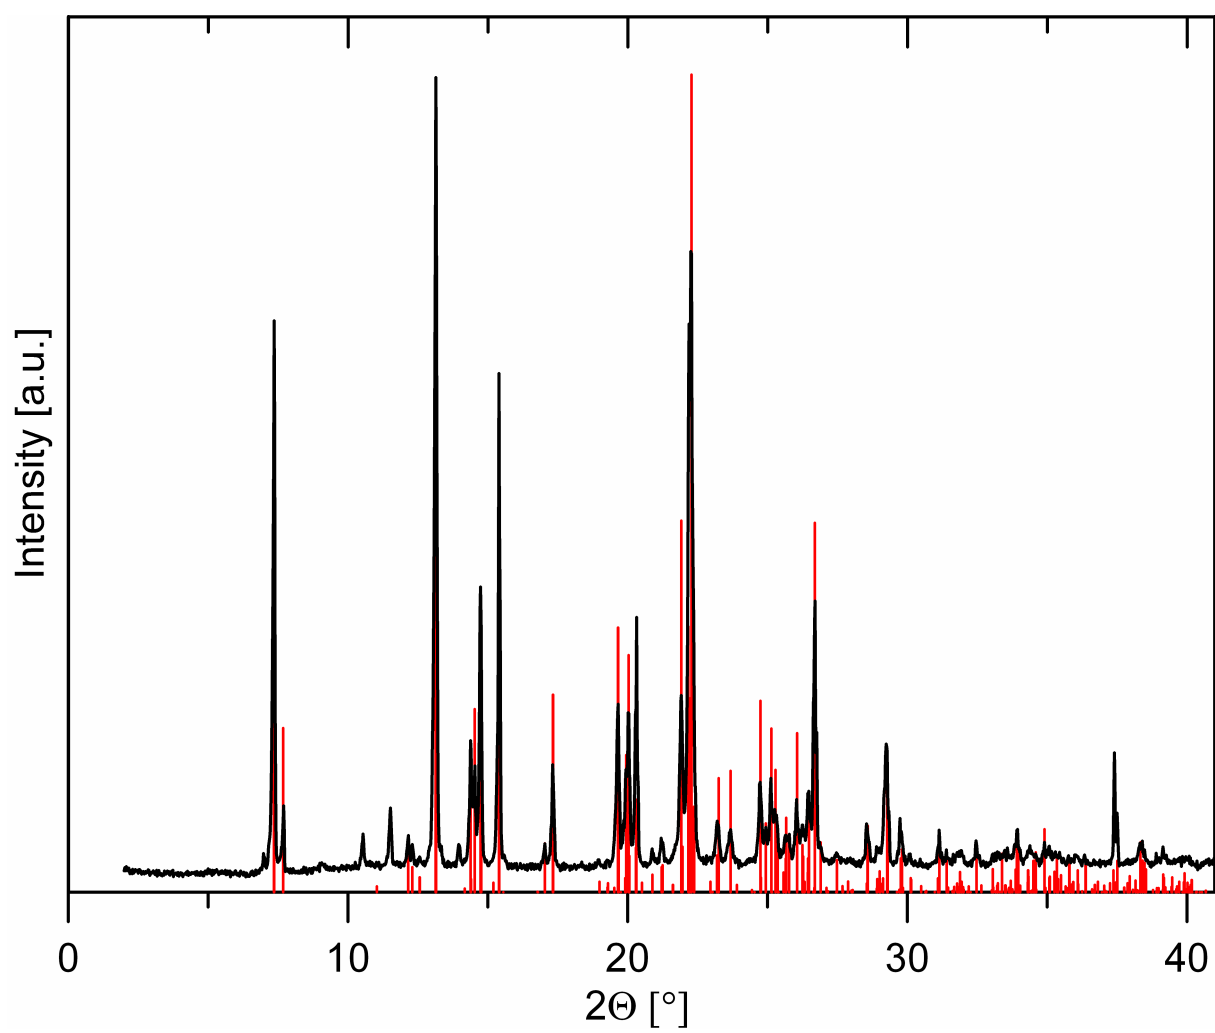

**Figure S16** Powder X-ray pattern of **5**.
